# Supplementary material for: Gelation of ethosome-like catanionic vesicles by water-soluble polymers: ethanol and cholesterol effects
Source: Royal Society of Chemistry journal article supplement (doi:10.1039/c3sm51061a), 2013-01-01
Supplement: c3sm51061a.pdf [file c3sm51061a.pdf]

Supplementary data

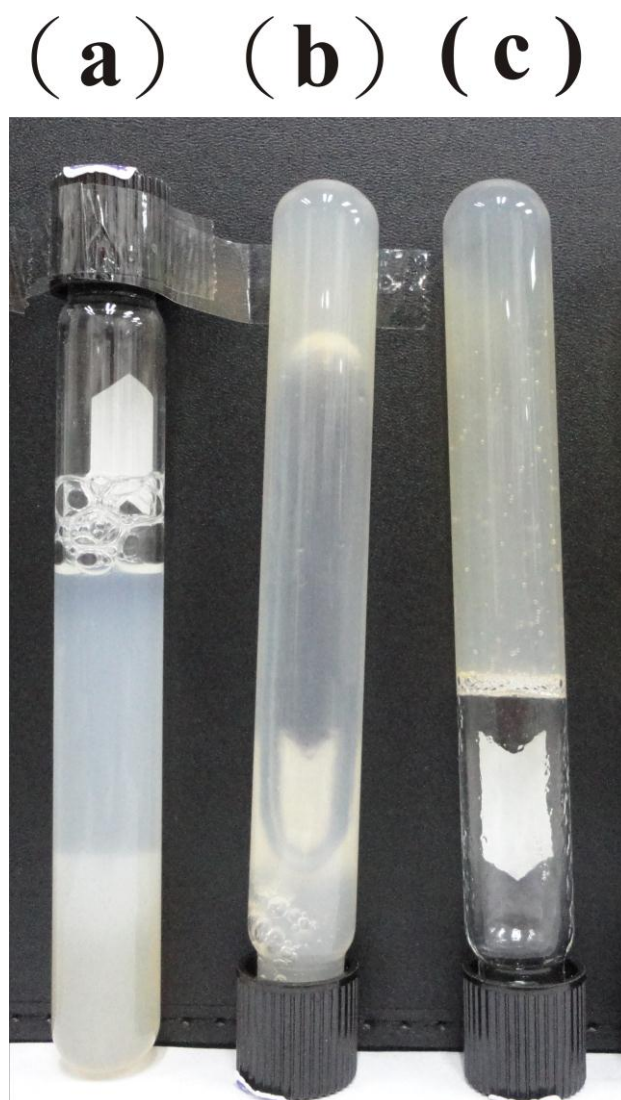

Fig. S1 Typical phases of ethosome-like catanionic vesicle/polymer mixtures identified by tube inversion method. (a) phase separation ( $\text{HMP}^+$ , 2wt%), (b) viscous liquid ( $\text{HMP}^+$ , 3wt%), (c) gel ( $\text{HMP}^+$ , 4wt%). The ethosome-like catanionic vesicles with  $X_{\text{CHOL}} = 0.3$  were formed in 20 vol% EtOH/15 mM Tris buffer solution.

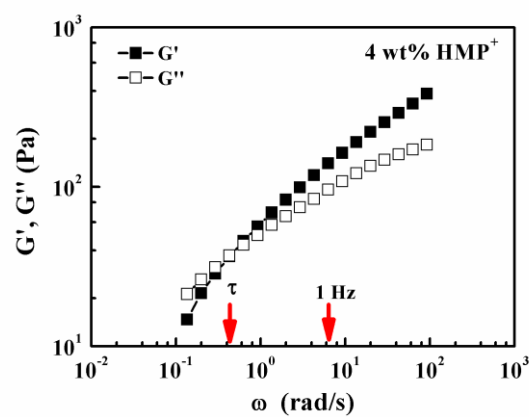

Fig. S2 Storage,  $G'$  (■), and loss,  $G''$  (□), moduli as a function of frequency,  $\omega$ , for catanionic vesicle with 4 wt% LM200 ( $\text{HMP}^+$ ). The ethosome-like catanionic vesicle with  $X_{\text{CHOL}} = 0.5$  was formed in 20 vol% EtOH/15 mM Tris buffer solution.

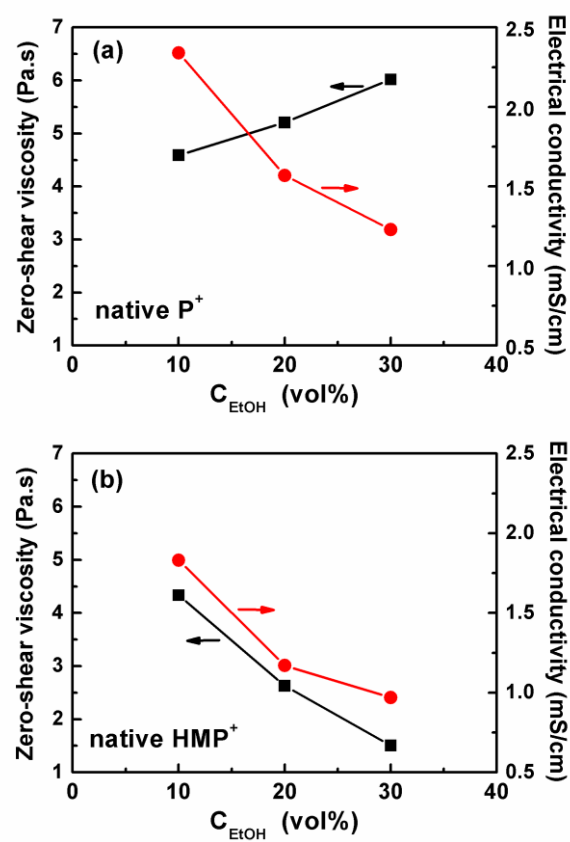

Fig. S3 Ethanol effects on the zero-shear viscosity and electrical conductivity of native polymer solutions (a)  $P^+$  and (b)  $HMP^+$  in 15 mM Tris buffer solution. The polymer concentrations for zero-shear viscosity and electric conductivity measurements were 4 wt% and 1 wt%, respectively.

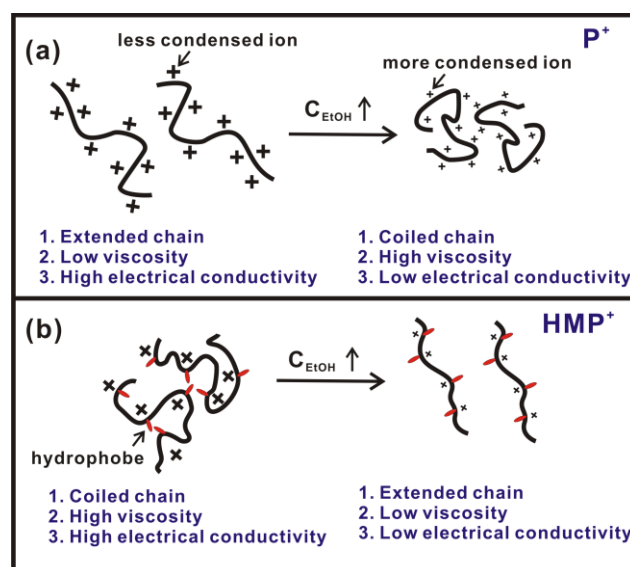

Fig. S4 Schematic of ethanol effects on the polymer chain configuration of native polymers  $P^+$  and  $HMP^+$ . (a) For polymer  $P^+$ , the counterion condensation leads to formation of coiled backbone with increasing ethanol concentration. (b) Conversely, for polymer  $HMP^+$ , strong hydrophobe-solvent interaction privileges high solvation of macromolecular chains rather than polymer-polymer interaction with increasing ethanol concentration.

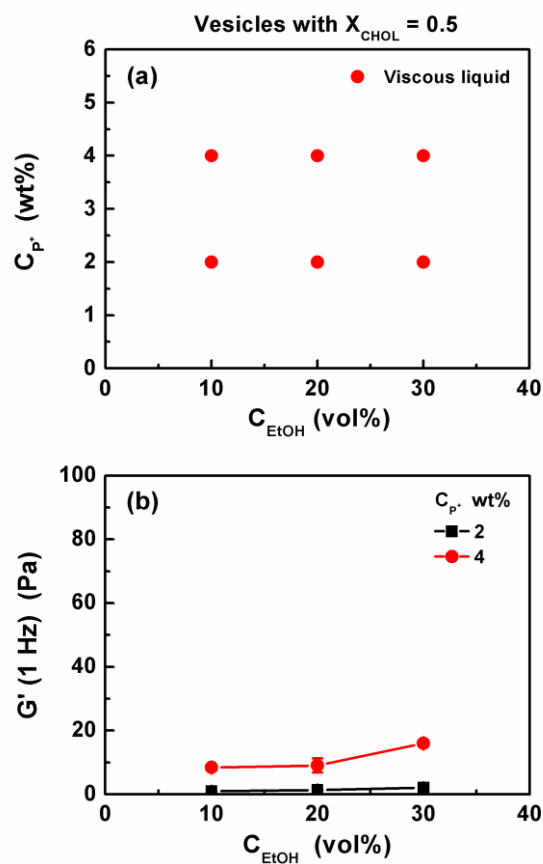

Fig. S5 Ethanol concentration effects on (a) phase map and (b) storage modulus,

$G'(1 \text{ Hz})$  of mixtures of ethosome-like catanionic vesicle and polymer  $P^+$ .

The ethosome-like catanionic vesicles at  $X_{\text{CHOL}} = 0.5$  with various EtOH concentrations.

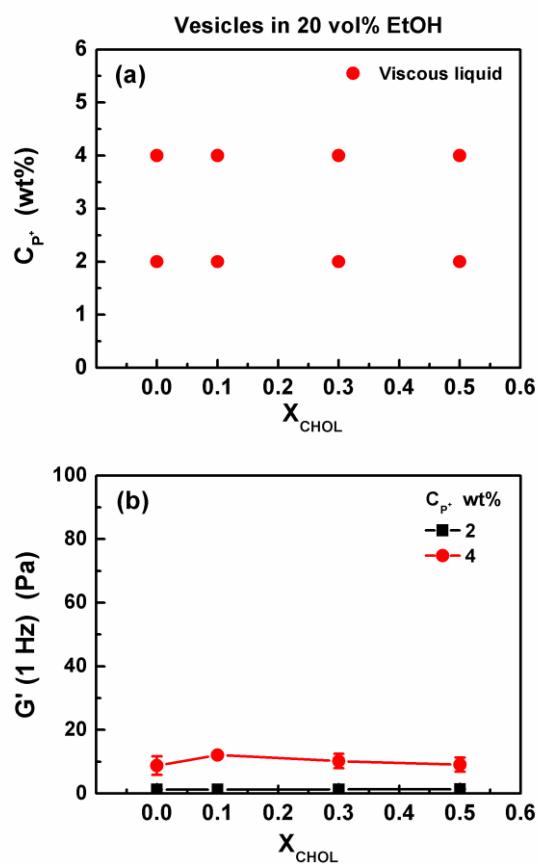

Fig. S6 Cholesterol content effects on (a) phase map and (b) storage modulus,  $G'$ (1 Hz) of mixtures of ethosome-like catanionic vesicle and polymer  $P^+$ . The ethosome-like catanionic vesicles were prepared from DeTMA-DS with various molar fractions of cholesterol in 20 vol% EtOH.
